# Supplementary figures and images for: Vaccination with early ferroptotic cancer cells induces efficient antitumor immunity
Source: HighWire-hosted journal article supplement (doi:10.1136/jitc-2020-001369), 2020-11-01

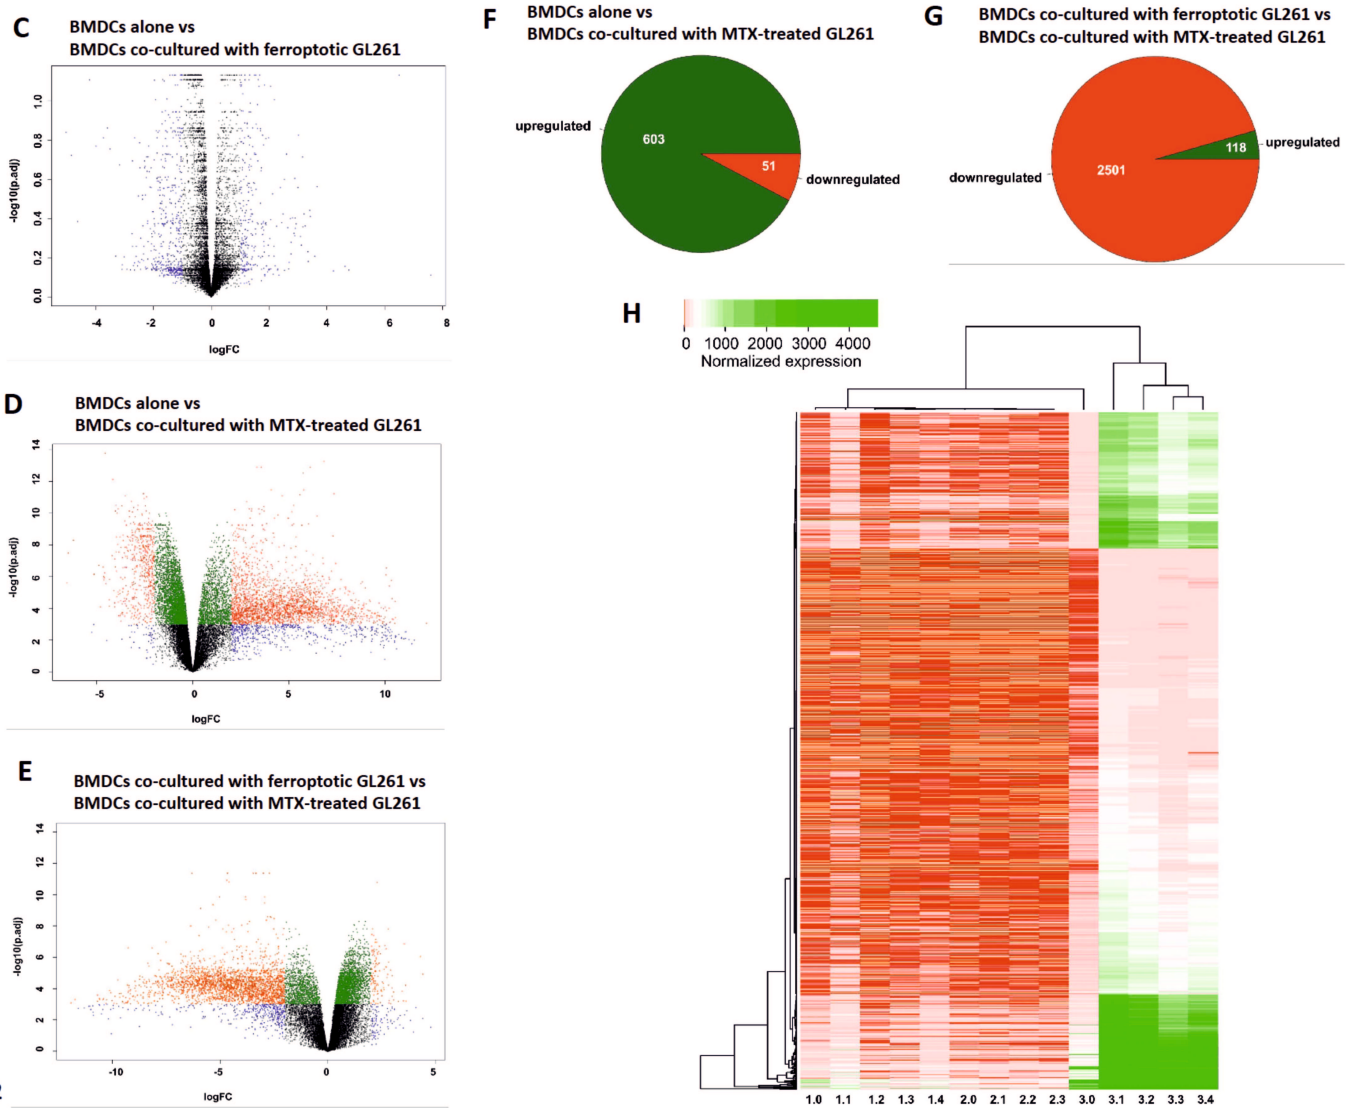

Fig S2

Supplement: jitc-2020-001369supp003_data_supplement.pdf [file jitc-2020-001369supp003_data_supplement.pdf]
